# Supplementary material
Source: PubMed Central journal article supplement (PMC10348667)
Supplement: NIHMS1902640-supplement-4.pdf [file NIHMS1902640-supplement-4.pdf]

## **Supplementary Material**

### **Table of Contents**

Supplementary Figures 1-5 (Pages 2-6)

Supplementary Tables 1-7 (Pages 7-13)

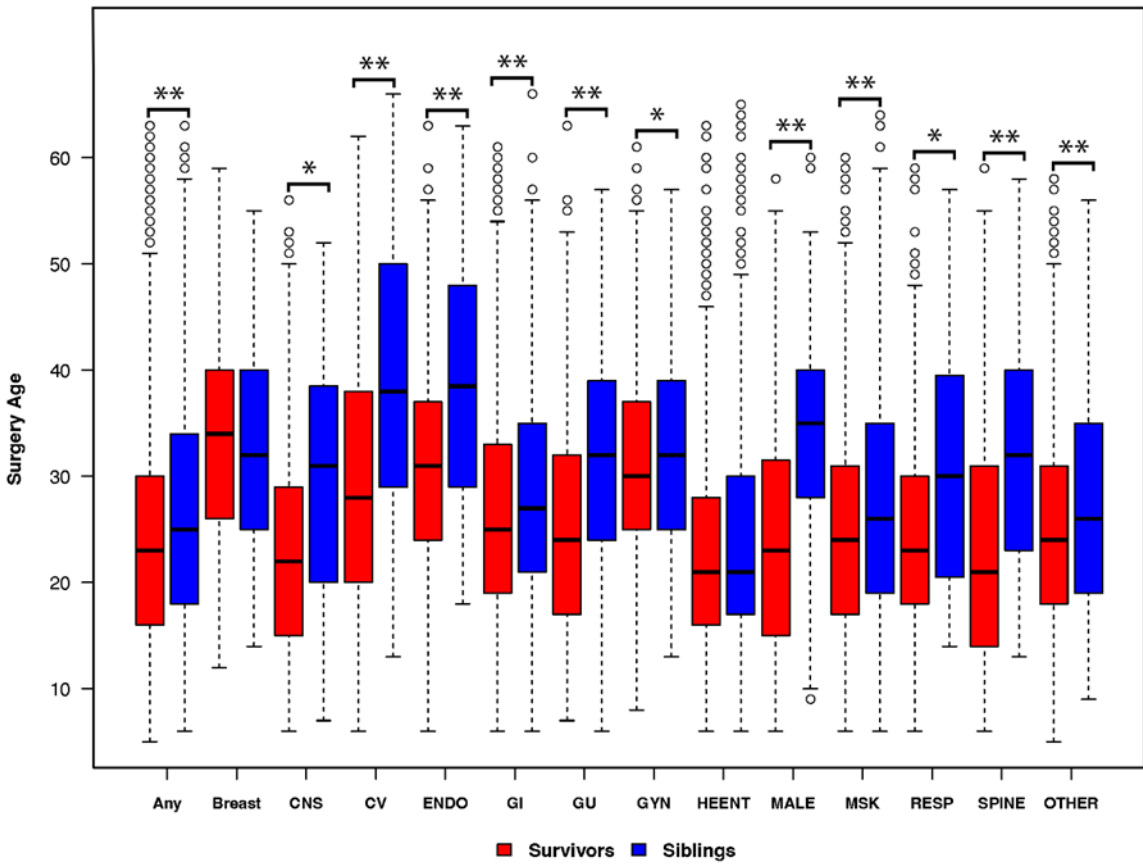

**Supplementary Figure 1.** Median age at the first late, major surgical intervention (any, and by organ system) in survivors of childhood cancer versus siblings. Boxplots show median (horizontal black line) with interquartile range (red or blue shaded boxes). \*p<0.05, \*\*p<0.001

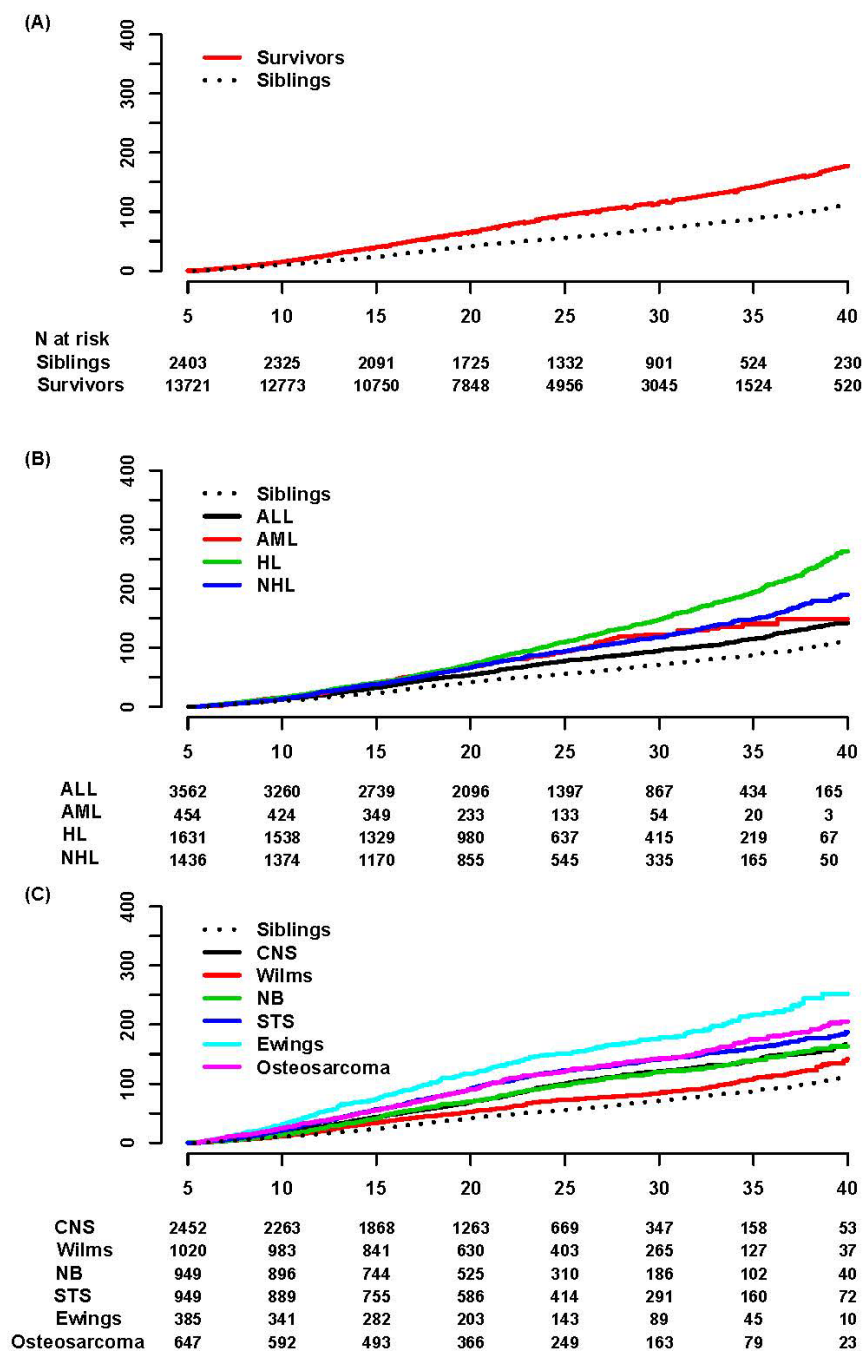

**Supplementary Figure 2.** (A) Mean cumulative counts of major late surgical interventions in male childhood cancer survivors compared to nearest-age sibling controls. (B) Mean cumulative counts of major late surgical procedures undergone by childhood cancer survivors of hematologic malignancies and (C) solid tumors compared to nearest-age sibling controls. ALL – acute lymphoblastic leukemia, AML – acute myeloid leukemia, HL – Hodgkin lymphoma, NHL – non-Hodgkin lymphoma, CNS – central nervous system tumors, Wilms – Wilms tumor, NB – neuroblastoma, STS – soft tissue sarcoma, Ewings – Ewing sarcoma, N – number. Y-axis shows mean cumulative counts per 100 individuals; X-axis shows years from cancer diagnosis for A-C.

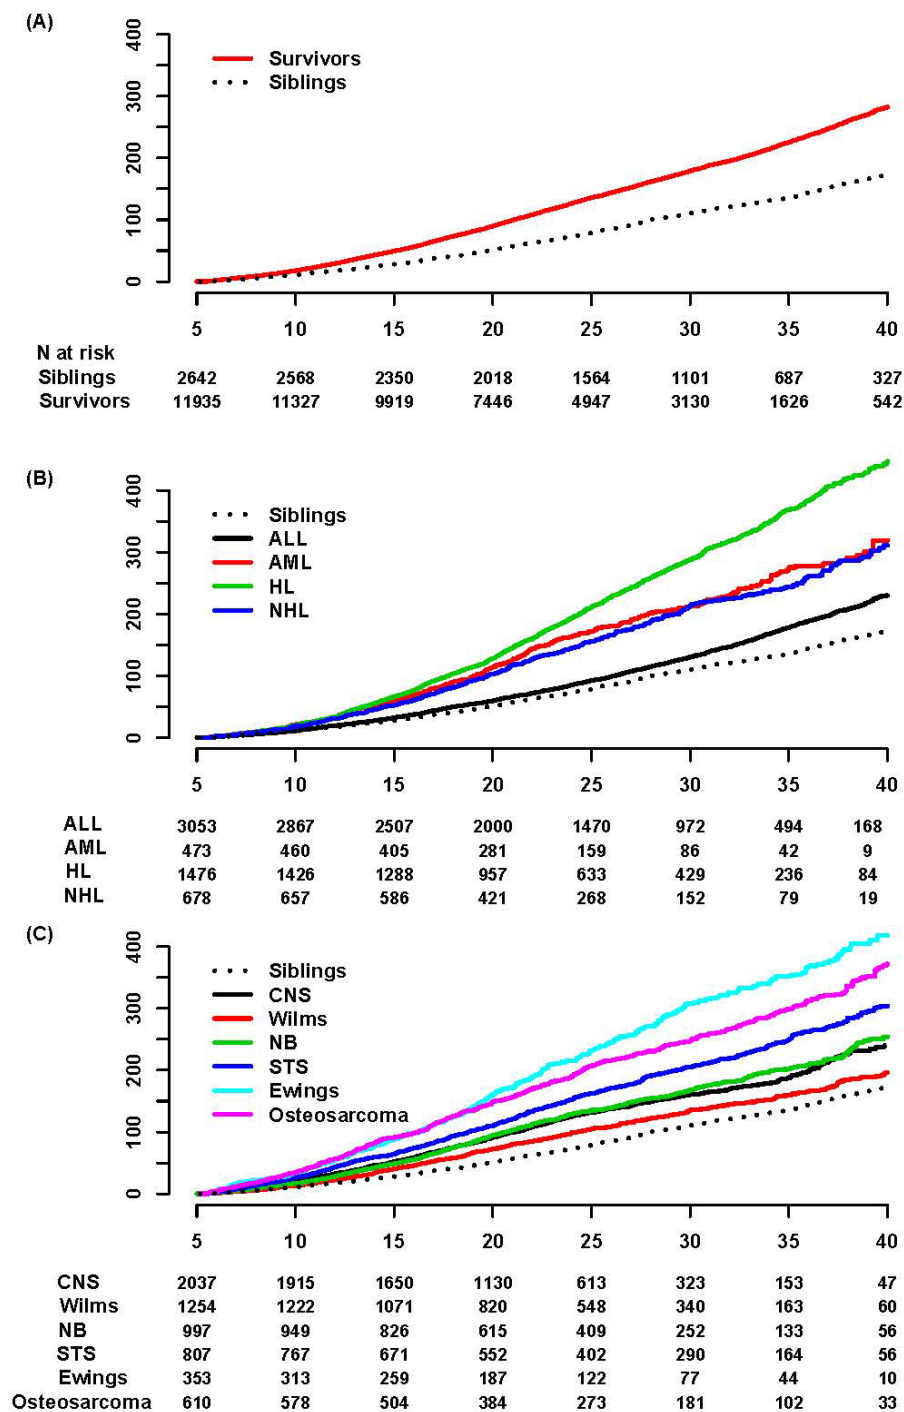

**Supplementary Figure 3.** (A) Mean cumulative counts of major late surgical interventions in female childhood cancer survivors compared to nearest-age sibling controls. (B) Mean cumulative counts of major late surgical procedures undergone by childhood cancer survivors of hematologic malignancies and (C) solid tumors compared to nearest-age sibling controls. ALL – acute lymphoblastic leukemia, AML – acute myeloid leukemia, HL – Hodgkin lymphoma, NHL – non-Hodgkin lymphoma, CNS – central nervous system tumors, Wilms – Wilms tumor, NB – neuroblastoma, STS – soft tissue sarcoma, Ewings – Ewing sarcoma, N – number. Y-axis shows mean cumulative counts per 100 individuals; X-axis shows years from cancer diagnosis for A-C.

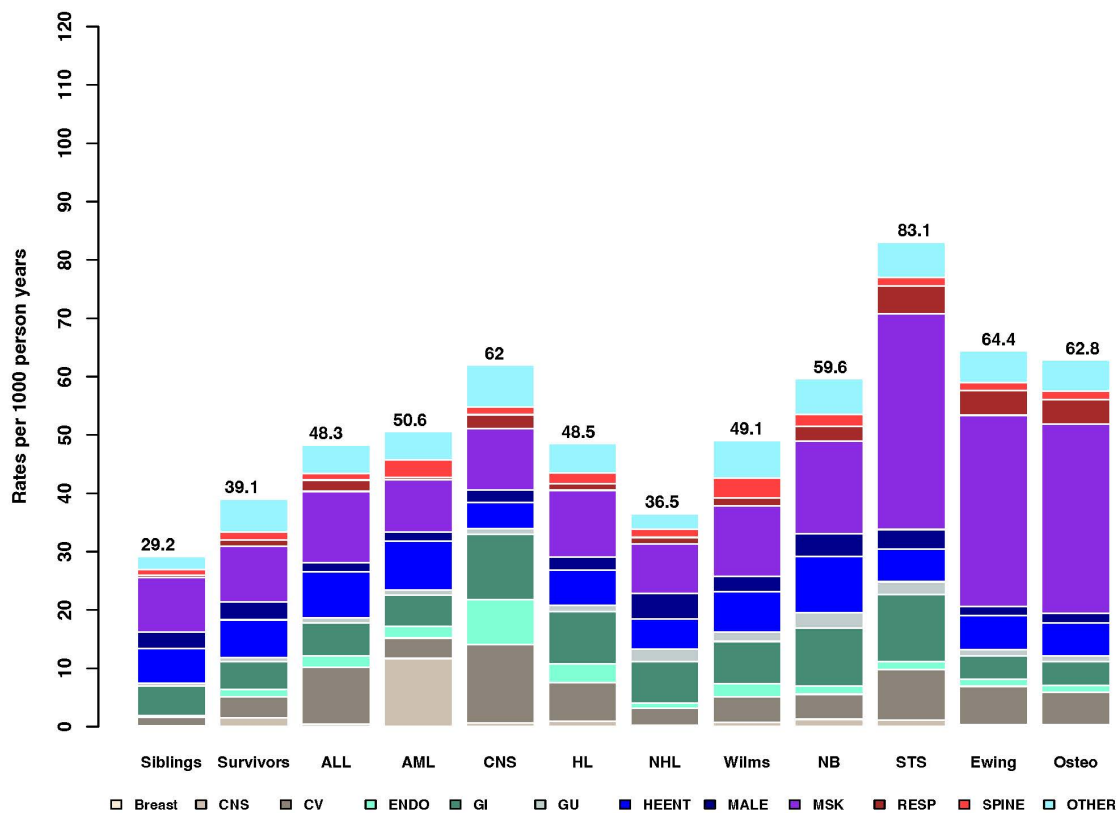

**Supplementary Figure 4.** Rates of late, major surgical intervention among male childhood cancer survivors, per 1000-person years of follow-up. Rates of intervention are stratified by cancer diagnosis and compared with age-matched sibling controls. Cancer types: ALL – acute lymphoblastic leukemia, AML – acute myeloid leukemia, CNS – central nervous system tumors, HL – Hodgkin lymphoma, NHL – non-Hodgkin lymphoma, Wilms – Wilms tumor, NB – neuroblastoma, STS – soft tissue sarcoma, Ewing – Ewing sarcoma. Organ systems: CNS – central nervous system, CV – cardiovascular, ENDO – endocrine, GI – gastrointestinal, GU – genitourinary, HEENT – head, eye, ears, nose and throat, Male – male reproductive surgery, MSK – musculoskeletal, RESP – respiratory

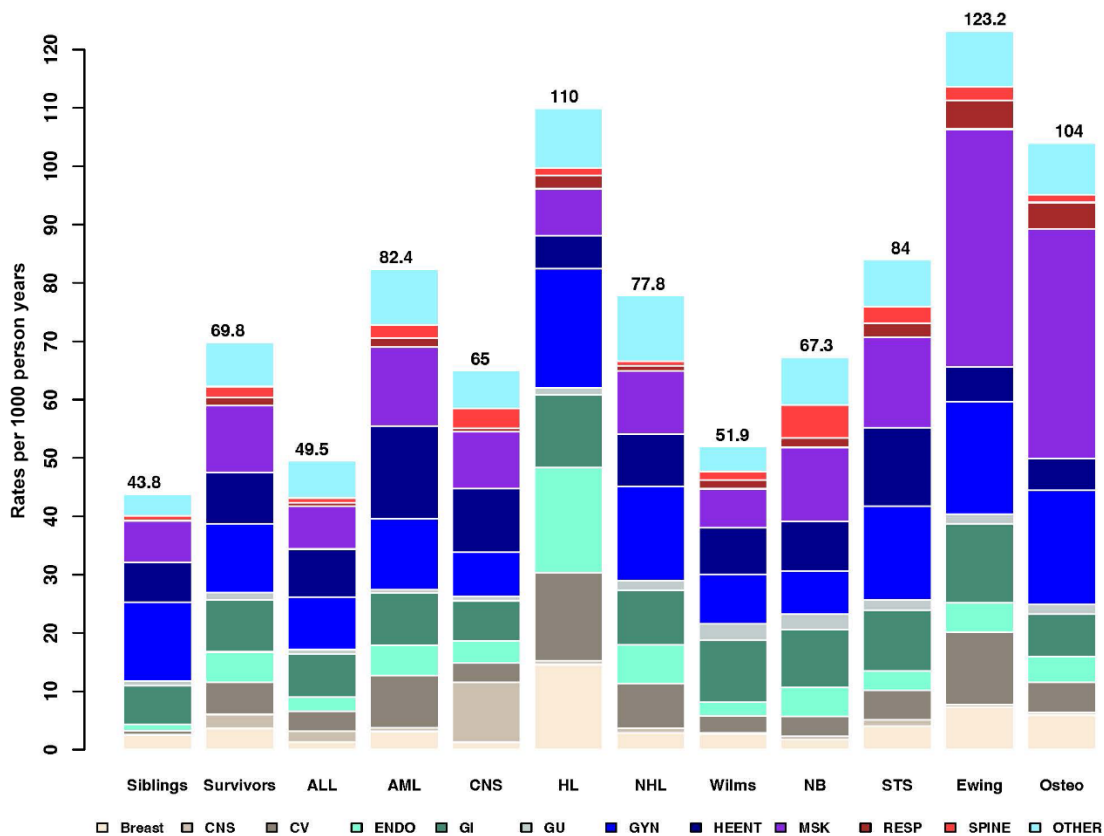

**Supplementary Figure 5.** Rates of late, major surgical intervention among female childhood cancer survivors, per 1000-person years of follow-up. Rates of intervention are stratified by cancer diagnosis and compared with age-matched sibling controls. Cancer types: ALL – acute lymphoblastic leukemia, AML – acute myeloid leukemia, CNS – central nervous system tumors, HL – Hodgkin lymphoma, NHL – non-Hodgkin lymphoma, Wilms – Wilms tumor, NB – neuroblastoma, STS – soft tissue sarcoma, Ewing – Ewing sarcoma. Organ systems: CNS – central nervous system, CV – cardiovascular, ENDO – endocrine, GI – gastrointestinal, GU – genitourinary, GYN – gynecologic, HEENT – head, eye, ears, nose and throat, MSK – musculoskeletal, RESP – respiratory

**Supplementary Table 1. Adjusted rate ratios for undergoing any late, major surgical intervention for childhood cancer survivors, overall and by primary cancer diagnosis, compared to siblings**

|                                                        | <b>Rate Ratio*<br/>(95% confidence interval)</b> |
|--------------------------------------------------------|--------------------------------------------------|
| Siblings                                               | 1.0 (ref.)                                       |
| All Survivors                                          | 1.8 (1.7-1.9)                                    |
| <i>Primary Cancer Diagnosis (relative to siblings)</i> |                                                  |
| Acute Lymphoblastic Leukemia                           | 1.5 (1.4 - 1.6)                                  |
| Acute Myeloid Leukemia                                 | 2.1 (1.9 - 2.3)                                  |
| Central nervous system                                 | 1.8 (1.6 - 1.9)                                  |
| Astrocytomas                                           | 1.7 (1.5 - 1.8)                                  |
| Medulloblastoma, PNET                                  | 2.0 (1.8 - 2.2)                                  |
| Other CNS tumors                                       | 1.8 (1.6 - 2.1)                                  |
| Hodgkin Lymphoma                                       | 2.1 (1.9 - 2.2)                                  |
| Non-Hodgkin Lymphoma                                   | 1.7 (1.6 - 1.9)                                  |
| Wilms Tumor                                            | 1.6 (1.4 - 1.7)                                  |
| Neuroblastoma                                          | 2.2 (2.0 - 2.4)                                  |
| Soft Tissue Sarcoma                                    | 2.0 (1.8 - 2.1)                                  |
| Ewing Sarcoma                                          | 2.6 (2.4 - 2.9)                                  |
| Osteosarcoma                                           | 2.1 (1.9 - 2.3)                                  |

\*Adjusted for attained age as cubic splines, sex, race/ethnicity, and health insurance status; CNS – central nervous system; PNET – primitive neuroectodermal tumor

**Supplementary Table 2. Mean Cumulative Counts of Late, Major Surgical Interventions in Childhood Cancer Survivors and Siblings According to Time and Diagnosis**

|                                 | 10-year<br>MCC        | 15-year<br>MCC        | 20-year<br>MCC              | 25-year<br>MCC           | 30-year MCC              | 35-year MCC              |
|---------------------------------|-----------------------|-----------------------|-----------------------------|--------------------------|--------------------------|--------------------------|
| All survivors                   | 17.0 (16.4 -<br>17.6) | 46.5 (45.3<br>- 47.7) | 82.1 (80.3<br>- 83.8)       | 123.5 (121.0<br>- 125.9) | 162.9 (159.7 -<br>166.0) | 206.7 (202.7 -<br>210.8) |
| Siblings                        | 10.9 (9.8 -<br>12.1)  | 27.3 (25.4<br>- 29.2) | 50.3 (47.6<br>- 53.0)       | 74.4 (70.8 -<br>78.0)    | 103.1 (98.3 -<br>107.8)  | 128.9 (123.0 -<br>134.7) |
| Acute lymphoblastic<br>leukemia | 12.5 (11.4 -<br>13.6) | 33.7 (31.6<br>- 35.8) | 59.1 (56.0<br>- 62.1)       | 89.8 (85.3 -<br>94.2)    | 122.9 (117.3 -<br>128.6) | 164.6 (157.2 -<br>172.0) |
| Acute myeloid<br>leukemia       | 18.9 (15.4 -<br>22.5) | 52.0 (45.4<br>- 58.6) | 95.9 (85.6<br>- 106.1)      | 145.7 (131.3<br>- 160.2) | 184.5 (166.2 -<br>202.9) | 236.7 (208.8 -<br>264.6) |
| Central Nervous<br>System       | 19.4 (17.8 -<br>21.0) | 48.6 (45.8<br>- 51.4) | 81.8 (77.7<br>- 85.9)       | 120.1 (114.4<br>- 125.8) | 147.6 (140.4 -<br>154.9) | 173.9 (163.6 -<br>184.2) |
| Hodgkin lymphoma                | 19.5 (17.4 -<br>21.6) | 59.7 (55.7<br>- 63.7) | 112.6<br>(106.9 -<br>118.4) | 184.7 (176.7<br>- 192.6) | 256.6 (246.2 -<br>267.0) | 333.3 (320.1 -<br>346.6) |
| Non-Hodgkin<br>lymphoma         | 16.1 (13.7 -<br>18.4) | 45.9 (41.6<br>- 50.1) | 84.6 (78.4<br>- 90.9)       | 127.7 (119.2<br>- 136.2) | 178.1 (165.0 -<br>191.2) | 216.3 (200.8 -<br>231.7) |
| Wilms tumor                     | 12.4 (10.5 -<br>14.2) | 38.0 (34.7<br>- 41.4) | 66.1 (61.3<br>- 70.9)       | 94.7 (88.3 -<br>101.2)   | 120.4 (112.2 -<br>128.6) | 149.2 (138.5 -<br>160.0) |
| Neuroblastoma                   | 15.5 (13.4 -<br>17.6) | 45.0 (41.2<br>- 48.9) | 84.9 (78.6<br>- 91.3)       | 120.9 (112.3<br>- 129.5) | 152.1 (141.0 -<br>163.3) | 185.1 (170.9 -<br>199.3) |
| Soft tissue sarcoma             | 24.3 (21.3 -<br>27.4) | 65.0 (59.8<br>- 70.2) | 107.9<br>(101.0 -<br>114.8) | 156.1 (146.5<br>- 165.7) | 194.7 (182.9 -<br>206.6) | 233.8 (219.4 -<br>248.2) |
| Ewing sarcoma                   | 33.7 (28.6 -<br>38.8) | 83.5 (74.5<br>- 92.4) | 148.8<br>(135.5 -<br>162.2) | 206.7 (189.5<br>- 223.8) | 270.4 (247.1 -<br>293.7) | 322.9 (294.5 -<br>351.3) |
| Osteosarcoma                    | 30.9 (27.1 -<br>34.6) | 77.1 (70.4<br>- 83.8) | 127.8<br>(118.5 -<br>137.1) | 180.5 (167.1<br>- 193.9) | 219.1 (202.9 -<br>235.4) | 269.6 (250.1 -<br>289.2) |

MCC – Mean cumulative count per 100 individuals



**Supplementary Table 3. Rates of Death (Competing Event) in Siblings, Survivors, and Survivors According to Primary Cancer Diagnosis**

|                                 | Number of deaths | Death Rate per 1000 person years<br>(95% confidence interval) |
|---------------------------------|------------------|---------------------------------------------------------------|
| Siblings                        | 8                | 0.1 (0.0 - 0.1)                                               |
| All Survivors                   | 1823             | 3.7 (3.6 - 3.9)                                               |
| <i>Primary Cancer Diagnosis</i> |                  |                                                               |
| Acute Lymphoblastic Leukemia    | 440              | 3.2 (2.9 - 3.4)                                               |
| Acute Myeloid Leukemia          | 53               | 3.4 (2.6 - 4.5)                                               |
| Central nervous system          | 413              | 5.6 (5.1 - 6.2)                                               |
| Hodgkin Lymphoma                | 247              | 4.2 (3.7 - 4.7)                                               |
| Non-Hodgkin Lymphoma            | 94               | 2.4 (2.0 - 3.0)                                               |
| Wilms Tumor                     | 67               | 1.6 (1.2 - 2.0)                                               |
| Neuroblastoma                   | 99               | 2.8 (2.3 - 3.4)                                               |
| Soft Tissue Sarcoma             | 131              | 3.8 (3.2 - 4.5)                                               |
| Ewing Sarcoma                   | 112              | 9.1 (7.5 - 10.9)                                              |
| Osteosarcoma                    | 109              | 4.7 (3.9 - 5.7)                                               |

**Supplementary Table 4. Sex-Specific Rates of Late, Major Surgical Intervention Displayed as Females Compared to Males (Reference)**

|                                 | All late, major surgical interventions    |         | All late, major surgical interventions, excluding sex-specific surgeries* |         |
|---------------------------------|-------------------------------------------|---------|---------------------------------------------------------------------------|---------|
|                                 | Rate Ratio**<br>(95% confidence interval) | P-value | Rate Ratio**<br>(95% confidence interval)                                 | P-value |
| All Survivors                   | 1.4 (1.4 - 1.5)                           | <.0001  | 1.2 (1.1 - 1.2)                                                           | <.0001  |
| <i>Primary Cancer Diagnosis</i> |                                           |         |                                                                           |         |
| Acute Lymphoblastic Leukemia    | 1.3 (1.1 - 1.4)                           | <.0001  | 1.1 (1.0 - 1.2)                                                           | 0.16    |
| Acute Myeloid Leukemia          | 1.5 (1.2 - 1.9)                           | <.0001  | 1.3 (1.0 - 1.6)                                                           | 0.019   |
| Central nervous system          | 1.3 (1.2 - 1.5)                           | <.0001  | 1.2 (1.1 - 1.3)                                                           | 0.0023  |
| Hodgkin Lymphoma                | 1.6 (1.5 - 1.8)                           | <.0001  | 1.2 (1.1 - 1.3)                                                           | 0.0012  |
| Non-Hodgkin Lymphoma            | 1.7 (1.5 - 1.9)                           | <.0001  | 1.3 (1.1 - 1.5)                                                           | 0.00032 |
| Wilms Tumor                     | 1.4 (1.2 - 1.6)                           | <.0001  | 1.3 (1.1 - 1.5)                                                           | 0.0015  |
| Neuroblastoma                   | 1.3 (1.1 - 1.5)                           | 0.00064 | 1.2 (1.0 - 1.4)                                                           | 0.022   |
| Soft Tissue Sarcoma             | 1.4 (1.2 - 1.6)                           | <.0001  | 1.1 (1.0 - 1.3)                                                           | 0.060   |
| Ewing Sarcoma                   | 1.5 (1.2 - 1.8)                           | <.0001  | 1.2 (1.0 - 1.5)                                                           | 0.064   |
| Osteosarcoma                    | 1.6 (1.4 - 1.9)                           | <.0001  | 1.3 (1.1 - 1.5)                                                           | 0.0043  |

\*Excludes female gynecologic and male reproductive late, major surgical interventions.

\*\*Adjusted for attained age as cubic splines, sex, race/ethnicity, and health insurance status.

**Supplementary Table 5. Identification of Individual ICD-9 Procedures Less Common in Survivors than Siblings**

| ICD-9 Code          | Organ system category | Description of Procedure                                       | # of interventions per 1000 person-years of follow-up, survivors | # of interventions per 1000 person-years of follow-up, siblings | Adjusted rate ratio* (95% confidence interval) | P      |
|---------------------|-----------------------|----------------------------------------------------------------|------------------------------------------------------------------|-----------------------------------------------------------------|------------------------------------------------|--------|
| 11.X                | HEENT                 | Operations on cornea                                           | 0.14 (0.11 - 0.18)                                               | 0.32 (0.22 - 0.44)                                              | <b>0.5 (0.3 - 0.8)</b>                         | 0.0016 |
| 14.X                | HEENT                 | Operations on retina, choroid, vitreous, and posterior chamber | 0.05 (0.03 - 0.07)                                               | 0.10 (0.05 - 0.18)                                              | 0.7 (0.3 - 1.8)                                | 0.43   |
| 21.X                | HEENT                 | Operations on nose                                             | 0.40 (0.34 - 0.46)                                               | 0.53 (0.41 - 0.69)                                              | 0.8 (0.6 - 1.2)                                | 0.34   |
| 23.X                | HEENT                 | Removal and restoration of teeth                               | 1.60 (1.49 - 1.71)                                               | 2.01 (1.76 - 2.29)                                              | <b>0.8 (0.7 - 0.9)</b>                         | 0.0032 |
| 28.X                | HEENT                 | Operations on tonsils and adenoids                             | 1.64 (1.53 - 1.75)                                               | 1.85 (1.61 - 2.12)                                              | 0.8 (0.7 - 1.0)                                | 0.052  |
| 41.9X               | GI                    | Other operations on spleen and bone marrow                     | 0.08 (0.06 - 0.11)                                               | 0.14 (0.08 - 0.22)                                              | <b>0.5 (0.2 - 0.9)</b>                         | 0.035  |
| 47.X                | GI                    | Operations on appendix                                         | 1.17 (1.08 - 1.26)                                               | 1.39 (1.18 - 1.63)                                              | 0.9 (0.7 - 1.0)                                | 0.12   |
| 49.X                | GI                    | Operations on anus                                             | 0.08 (0.06 - 0.11)                                               | 0.24 (0.16 - 0.35)                                              | <b>0.4 (0.2 - 0.7)</b>                         | 0.0018 |
| 53.X                | GI                    | Repair of hernia                                               | 0.81 (0.73 - 0.89)                                               | 1.04 (0.86 - 1.25)                                              | 0.8 (0.6 - 1.0)                                | 0.077  |
| 59.X                | GU                    | Other operations on urinary tract                              | 0.07 (0.05 - 0.10)                                               | 0.12 (0.06 - 0.20)                                              | 0.8 (0.4 - 1.5)                                | 0.50   |
| 63.X                | MALE                  | Operations on spermatic cord, epididymis, and vas deferens     | 0.82 (0.71 - 0.93)                                               | 2.00 (1.63 - 2.42)                                              | <b>0.5 (0.4 - 0.6)</b>                         | <.0001 |
| 65.X <sup>1</sup> , | GYN                   | Operations on ovary                                            | 0.62 (0.52 - 0.72)                                               | 0.76 (0.55 - 1.02)                                              | 0.9 (0.6 - 1.4)                                | 0.63   |
| 66.X                | GYN                   | Operations on fallopian tubes                                  | 1.47 (1.32 - 1.63)                                               | 2.58 (2.19 - 3.03)                                              | <b>0.6 (0.5 - 0.8)</b>                         | <.0001 |
| 67.X                | GYN                   | Operations on cervix                                           | 0.66 (0.56 - 0.77)                                               | 1.15 (0.89 - 1.46)                                              | <b>0.6 (0.4 - 0.8)</b>                         | 0.0011 |
| 68.X <sup>2</sup> , | GYN                   | Other incision and excision of uterus                          | 0.76 (0.65 - 0.87)                                               | 0.78 (0.57 - 1.04)                                              | 1.2 (0.8 - 1.7)                                | 0.34   |
| 69.X                | GYN                   | Other operations on uterus and supporting structures           | 0.97 (0.85 - 1.10)                                               | 1.32 (1.04 - 1.64)                                              | 0.8 (0.6 - 1.1)                                | 0.20   |
| 81.4X               | MSK                   | Other repair of joint of lower extremity                       | 1.31 (1.21 - 1.41)                                               | 1.39 (1.18 - 1.63)                                              | 1.0 (0.8 - 1.3)                                | 0.85   |
| 81.7X               | MSK                   | Arthroplasty and repair of hand, fingers, and wrist            | 0.09 (0.07 - 0.13)                                               | 0.10 (0.05 - 0.18)                                              | 1.0 (0.5 - 2.2)                                | 0.92   |
| 82.X                | MSK                   | Operations on muscle, tendon, and fascia of hand               | 0.24 (0.20 - 0.29)                                               | 0.39 (0.28 - 0.52)                                              | 0.7 (0.5 - 1.1)                                | 0.11   |
| 83.X                | MSK                   | Operations on muscle, tendon, fascia, and bursa, except hand   | 1.21 (1.11 - 1.31)                                               | 1.21 (1.02 - 1.43)                                              | 1.1 (0.9 - 1.4)                                | 0.40   |

\*Adjusted for attained age as cubic splines, sex, race/ethnicity, and health insurance status. <sup>1</sup> Female, excluding 65.3-65.6 “remove ovaries”; <sup>2</sup> Female, “excluding 68.3-68.9 Removal of uterus”

**Supplementary Table 6. Adjusted rate ratios of Late Surgical Intervention According to Decade of Diagnosis\***

| <i>Decade of diagnosis</i> | <b>Total survivors</b> |            | <b>Siblings**</b> |      | <b>ALL</b>      |            | <b>AML</b>      |      | <b>HL</b>       |       | <b>NHL</b>      |            |
|----------------------------|------------------------|------------|-------------------|------|-----------------|------------|-----------------|------|-----------------|-------|-----------------|------------|
|                            | RR (95% CI)            | P          | RR (95% CI)       | P    | RR (95% CI)     | P          | RR (95% CI)     | P    | RR (95% CI)     | P     | RR (95% CI)     | P          |
| 1970-1979                  | 1.0 (ref)              |            | 1.0 (ref)         |      | 1.0 (ref)       |            | 1.0 (ref)       |      | 1.0 (ref)       |       | 1.0 (ref)       |            |
| 1980-1989                  | 1.0 (0.9 - 1.1)        | 0.93       | 1.1 (0.9 - 1.2)   | 0.41 | 0.9 (0.8 - 1.0) | 0.028      | 1.0 (0.7 - 1.5) | 0.79 | 1.0 (0.8 - 1.1) | 0.50  | 1.2 (1.0 - 1.5) | 0.061      |
| 1990-1999                  | 1.4 (1.3 - 1.5)        | <.000<br>1 | 1.1 (0.9 - 1.3)   | 0.25 | 1.4 (1.2 - 1.6) | <.000<br>1 | 1.1 (0.8 - 1.5) | 0.71 | 1.2 (1.0 - 1.4) | 0.020 | 1.6 (1.3 - 1.9) | <.000<br>1 |

| <i>Decade of diagnosis</i> | <b>CNS</b>      |            | <b>Wilms tumor</b> |      | <b>Neuroblastoma</b> |            | <b>STS</b>      |            | <b>Ewing sarcoma</b> |       | <b>Osteosarcoma</b> |            |
|----------------------------|-----------------|------------|--------------------|------|----------------------|------------|-----------------|------------|----------------------|-------|---------------------|------------|
|                            | RR (95% CI)     | P          | RR (95% CI)        | P    | RR (95% CI)          | P          | RR (95% CI)     | P          | RR (95% CI)          | P     | RR (95% CI)         | P          |
| 1970-1979                  | 1.0 (ref)       |            | 1.0 (ref)          |      | 1.0 (ref)            |            | 1.0 (ref)       |            | 1.0 (ref)            |       | 1.0 (ref)           |            |
| 1980-1989                  | 1.2 (1.0 - 1.4) | 0.052      | 0.9 (0.7 - 1.1)    | 0.20 | 1.1 (0.9 - 1.3)      | 0.51       | 0.9 (0.8 - 1.2) | 0.54       | 1.0 (0.8 - 1.3)      | 0.79  | 1.6 (1.2 - 2.0)     | 0.001<br>4 |
| 1990-1999                  | 1.8 (1.5 - 2.2) | <.000<br>1 | 1.1 (0.9 - 1.4)    | 0.35 | 1.6 (1.3 - 2.0)      | <.000<br>1 | 1.4 (1.2 - 1.8) | 0.001<br>1 | 1.3 (1.0 - 1.6)      | 0.051 | 2.8 (2.3 - 3.5)     | <.000<br>1 |

\*Analysis adjusted to include only late, major surgical intervention occurring  $\leq 20$  years from diagnosis to control for inherent differential follow-up among survivors diagnosed during different decades.\*\*Pseudo-diagnosis date used for age-matched sibling controls. ALL – acute lymphoblastic leukemia, AML – acute myeloid leukemia, HL – Hodgkin lymphoma, NHL – non-Hodgkin lymphoma, CNS – central nervous system tumors, STS – soft tissue sarcoma

**Supplementary Table 7. Adjusted rate ratios of Late Surgical Intervention According to Organ System of Intervention and Decade of Diagnosis\***

| <i>Decade of diagnosis</i> | Breast          |        | Cardiovascular  |        | Central nervous system |        | Endocrine       |         | Female gynecologic |         | Gastrointestinal |      |
|----------------------------|-----------------|--------|-----------------|--------|------------------------|--------|-----------------|---------|--------------------|---------|------------------|------|
|                            | RR (95% CI)     | P      | RR (95% CI)     | P      | RR (95% CI)            | P      | RR (95% CI)     | P       | RR (95% CI)        | P       | RR (95% CI)      | P    |
| 1970-1979                  | 1.0 (ref)       |        | 1.0 (ref)       |        | 1.0 (ref)              |        | 1.0 (ref)       |         | 1.0 (ref)          |         | 1.0 (ref)        |      |
| 1980-1989                  | 0.5 (0.4 - 0.7) | <.0001 | 1.2 (0.9 - 1.5) | 0.21   | 1.3 (1.0 - 1.6)        | 0.095  | 0.7 (0.6 - 0.9) | 0.00050 | 0.8 (0.6 - 0.9)    | 0.0032  | 0.9 (0.8 - 1.1)  | 0.24 |
| 1990-1999                  | 0.4 (0.3 - 0.5) | <.0001 | 3.3 (2.7 - 4.1) | <.0001 | 1.9 (1.5 - 2.4)        | <.0001 | 0.7 (0.6 - 0.9) | 0.00073 | 0.7 (0.6 - 0.9)    | 0.00037 | 1.1 (0.9 - 1.2)  | 0.36 |

| <i>Decade of diagnosis</i> | Head and neck   |         | Male reproductive |      | Musculoskeletal |        | Renal/urinary   |      | Respiratory     |      | Spine           |      |
|----------------------------|-----------------|---------|-------------------|------|-----------------|--------|-----------------|------|-----------------|------|-----------------|------|
|                            | RR (95% CI)     | P       | RR (95% CI)       | P    | RR (95% CI)     | P      | RR (95% CI)     | P    | RR (95% CI)     | P    | RR (95% CI)     | P    |
| 1970-1979                  | 1.0 (ref)       |         | 1.0 (ref)         |      | 1.0 (ref)       |        | 1.0 (ref)       |      | 1.0 (ref)       |      | 1.0 (ref)       |      |
| 1980-1989                  | 1.0 (0.9 - 1.2) | 0.48    | 1.2 (0.9 - 1.6)   | 0.27 | 1.1 (1.0 - 1.2) | 0.16   | 1.1 (0.8 - 1.5) | 0.72 | 0.9 (0.7 - 1.2) | 0.50 | 0.9 (0.7 - 1.2) | 0.42 |
| 1990-1999                  | 1.3 (1.1 - 1.5) | 0.00019 | 1.1 (0.8 - 1.4)   | 0.71 | 1.7 (1.5 - 2.0) | <.0001 | 1.2 (0.9 - 1.7) | 0.25 | 1.2 (0.9 - 1.7) | 0.22 | 1.1 (0.8 - 1.4) | 0.72 |

\*Analysis adjusted to include only late, major surgical intervention occurring  $\leq 20$  years from diagnosis to control for inherent differential follow-up among survivors diagnosed during different decades.
